# Supplementary material for: Integrative radiogenomics analysis for predicting molecular features and survival in clear cell renal cell carcinoma
Source: publisher site journal article supplement (doi:10.18632/aging.202752), 2021-03-26
Supplement: Supplementary file [file aging-v13i7-202752-supplementary-material-SD1.pdf]

SUPPLEMENTARY FIGURE

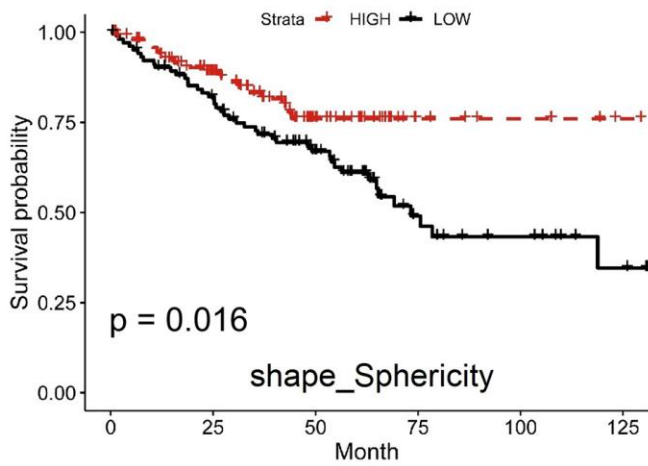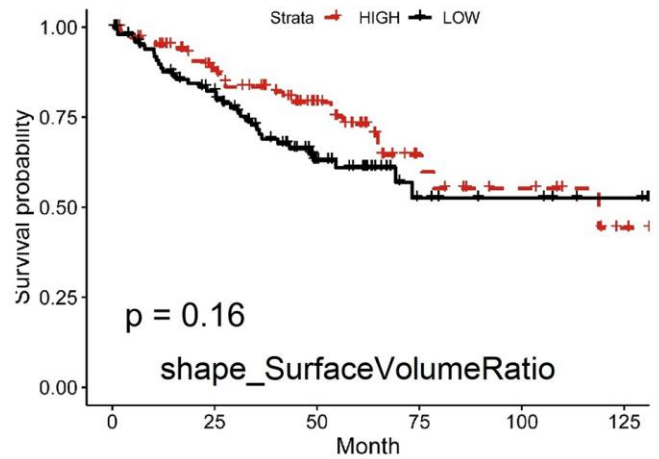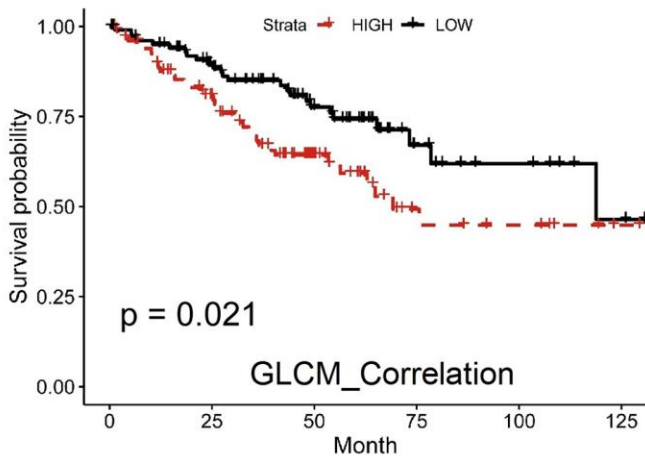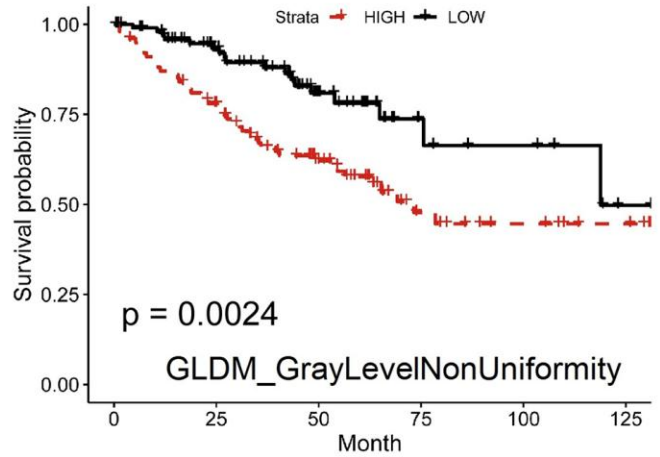

Supplementary Figure 1. Kaplan-Meier curves of groups with high-value and low-value “sphericity”, “surface-to-volume ratio”, “GLCM\_correlation” and “GLDM\_gray-level non-uniformity”.
