# Supplementary material for: Integrative radiogenomics analysis for predicting molecular features and survival in clear cell renal cell carcinoma
Source: publisher site journal article supplement (doi:10.18632/aging.202752), 2021-03-26
Supplement: Supplementary file [file aging-v13i7-202752-supplementary-material-SD5.pdf]

**Supplementary Table 4. Comparison of prognostic performance of models according to AUC.**

| <b>p value</b>         | <b>Radiomics</b> | <b>Radiomics+genomics</b> | <b>Radiomics+transcriptomics</b> | <b>Radiomics+proteomics</b> | <b>Multi-omics</b>    |
|------------------------|------------------|---------------------------|----------------------------------|-----------------------------|-----------------------|
| <b>Radiomics</b>       |                  |                           |                                  |                             |                       |
| 1-year AUC             | -                | 0.012                     | 0.008                            | 0.003                       | 1.04×10 <sup>-5</sup> |
| 2-year AUC             | -                | 0.026                     | 0.0007                           | 0.009                       | 0.003                 |
| 3-year AUC             | -                | 0.016                     | 0.002                            | 0.062                       | 0.005                 |
| <b>Genomics</b>        |                  |                           |                                  |                             |                       |
| 1-year AUC             | 0.247            | 0.026                     | -                                | -                           | 0.0002                |
| 2-year AUC             | 0.069            | 0.005                     | -                                | -                           | 3.40×10 <sup>-5</sup> |
| 3-year AUC             | 0.030            | 0.008                     | -                                | -                           | 0.0002                |
| <b>Transcriptomics</b> |                  |                           |                                  |                             |                       |
| 1-year AUC             | 0.159            | -                         | 0.007                            | -                           | 0.001                 |
| 2-year AUC             | 0.246            | -                         | 0.011                            | -                           | 0.001                 |
| 3-year AUC             | 0.674            | -                         | 0.003                            | -                           | 0.007                 |
| <b>Proteomics</b>      |                  |                           |                                  |                             |                       |
| 1-year AUC             | 0.053            | -                         | -                                | 0.006                       | 0.008                 |
| 2-year AUC             | 0.293            | -                         | -                                | 0.011                       | 0.002                 |
| 3-year AUC             | 0.868            | -                         | -                                | 0.029                       | 0.009                 |
