# Supplementary material for: Integrative radiogenomics analysis for predicting molecular features and survival in clear cell renal cell carcinoma
Source: Aging (Albany NY). 2021 Mar 26;13(7):9960–75. doi: 10.18632/aging.202752 (PMC8064160; doi:10.18632/aging.202752)
Supplement: Supplementary Table 2 [file aging-13-202752-s003.xlsx]

## Sheet: coxmedian2
Supplementary Table 2. Univariate cox analysis of radiomics features.
Radiomics feature	HR	Lower 95%CI	Upper 95%CI	p value
shape_VoxelVolume	2.08781	1.22542	3.55712	0.00677452
shape_Maximum3DDiameter	1.93303	1.14201	3.27194	0.0141086
shape_MeshVolume	2.08781	1.22542	3.55712	0.00677452
shape_MajorAxisLength	1.60489	0.953307	2.70182	0.0750706
shape_Sphericity	0.513404	0.296058	0.890312	0.0176152
shape_LeastAxisLength	1.83659	1.09104	3.0916	0.022145
shape_Elongation	0.856865	0.519695	1.41279	0.544857
shape_SurfaceVolumeRatio	0.698477	0.422569	1.15453	0.161649
shape_Maximum2DDiameterSlice	2.2644	1.3193	3.88656	0.00302375
shape_Flatness	1.00435	0.609995	1.65365	0.986388
shape_SurfaceArea	2.55527	1.46188	4.46645	0.000992335
shape_MinorAxisLength	1.94677	1.14998	3.29564	0.0131283
shape_Maximum2DDiameterColumn	1.80219	1.0707	3.03341	0.0266161
shape_Maximum2DDiameterRow	1.85413	1.09528	3.13875	0.021515
GLDM_GrayLevelVariance	1.33664	0.8068	2.21445	0.259952
GLDM_HighGrayLevelEmphasis	0.877899	0.531547	1.44993	0.610963
GLDM_DependenceEntropy	1.0455	0.634537	1.72262	0.861362
GLDM_DependenceNonUniformity	2.42044	1.38454	4.23136	0.0019245
GLDM_GrayLevelNonUniformity	2.28661	1.31964	3.96213	0.00318949
GLDM_SmallDependenceEmphasis	1.04993	0.637374	1.72954	0.848258
GLDM_SmallDependenceHighGrayLevelEmphasis	0.963583	0.585182	1.58667	0.884091
GLDM_DependenceNonUniformityNormalized	0.939506	0.570494	1.54721	0.806325
GLDM_LargeDependenceEmphasis	1.07253	0.651387	1.76595	0.783165
GLDM_LargeDependenceLowGrayLevelEmphasis	1.1092	0.674039	1.8253	0.683416
GLDM_DependenceVariance	1.04592	0.635376	1.72173	0.859871
GLDM_LargeDependenceHighGrayLevelEmphasis	0.9106	0.55089	1.50519	0.714937
GLDM_SmallDependenceLowGrayLevelEmphasis	1.17369	0.712175	1.93428	0.529803
GLDM_LowGrayLevelEmphasis	1.31519	0.792704	2.18205	0.28885
GLCM_JointAverage	0.865503	0.524071	1.42938	0.572541
GLCM_SumAverage	0.865503	0.524071	1.42938	0.572541
GLCM_JointEntropy	1.04316	0.633109	1.7188	0.868274
GLCM_ClusterShade	1.60062	0.949237	2.69898	0.0776419
GLCM_MaximumProbability	1.20759	0.733279	1.98872	0.458627
GLCM_Idmn	1.29574	0.784715	2.13954	0.311296
GLCM_JointEnergy	1.01957	0.619087	1.67911	0.939315
GLCM_Contrast	0.983204	0.596712	1.62003	0.946995
GLCM_DifferenceEntropy	0.850832	0.516859	1.40061	0.525297
GLCM_InverseVariance	0.94134	0.570343	1.55366	0.813076
GLCM_DifferenceVariance	0.886954	0.538845	1.45995	0.637078
GLCM_Idn	1.4079	0.850847	2.32966	0.183071
GLCM_Idm	1.4634	0.886805	2.41489	0.13625
GLCM_Correlation	1.80145	1.08312	2.99617	0.0233554
GLCM_Autocorrelation	0.873369	0.528871	1.44227	0.596777
GLCM_SumEntropy	1.4226	0.857398	2.36037	0.172436
GLCM_MCC	1.80296	1.08307	3.00133	0.0233979
GLCM_SumSquares	1.25966	0.761561	2.08352	0.368614
GLCM_ClusterProminence	1.5267	0.91829	2.5382	0.102825
GLCM_Imc2	1.68418	1.01296	2.80015	0.0444709
GLCM_Imc1	0.730311	0.442476	1.20539	0.218958
GLCM_DifferenceAverage	0.788543	0.478837	1.29856	0.350592
GLCM_Id	1.47091	0.891388	2.42719	0.131034
GLCM_ClusterTendency	1.3685	0.826705	2.26536	0.222494
histogram_InterquartileRange	1.23863	0.750944	2.04303	0.401937
histogram_Skewness	1.66458	0.981	2.82449	0.058911
histogram_Uniformity	0.782419	0.472761	1.2949	0.339803
histogram_Median	0.842289	0.509677	1.39196	0.503083
histogram_Energy	1.87861	1.10214	3.20211	0.0204824
histogram_RobustMeanAbsoluteDeviation	1.20691	0.731527	1.99123	0.461614
histogram_MeanAbsoluteDeviation	1.37442	0.829679	2.27682	0.216855
histogram_TotalEnergy	1.7049	1.01299	2.86943	0.0445855
histogram_Maximum	1.23828	0.749353	2.04621	0.404284
histogram_RootMeanSquared	0.898741	0.544257	1.48411	0.676547
histogram_90Percentile	1.20481	0.729923	1.98865	0.466181
histogram_Minimum	0.942895	0.570334	1.55882	0.818681
histogram_Entropy	1.30699	0.789344	2.16409	0.298081
histogram_Range	1.31589	0.795021	2.178	0.285639
histogram_Variance	1.33664	0.8068	2.21445	0.259952
histogram_10Percentile	0.679508	0.408971	1.12901	0.135815
histogram_Kurtosis	0.674206	0.406868	1.1172	0.126048
histogram_Mean	0.792571	0.479588	1.30981	0.364403
GLRLM_ShortRunLowGrayLevelEmphasis	1.44487	0.868589	2.40348	0.156377
GLRLM_GrayLevelVariance	1.3507	0.815428	2.23733	0.242999
GLRLM_LowGrayLevelRunEmphasis	1.20652	0.729039	1.99674	0.465126
GLRLM_GrayLevelNonUniformityNormalized	0.680116	0.408455	1.13246	0.13839
GLRLM_RunVariance	1.14631	0.696333	1.88707	0.591341
GLRLM_GrayLevelNonUniformity	2.30643	1.33155	3.99507	0.00286799
GLRLM_LongRunEmphasis	1.0152	0.616641	1.67135	0.952717
GLRLM_ShortRunHighGrayLevelEmphasis	0.834769	0.505496	1.37852	0.480397
GLRLM_RunLengthNonUniformity	2.42494	1.38712	4.23925	0.00188248
GLRLM_ShortRunEmphasis	1.00158	0.607828	1.6504	0.995068
GLRLM_LongRunHighGrayLevelEmphasis	0.853698	0.51587	1.41276	0.538249
GLRLM_RunPercentage	0.953218	0.578929	1.56949	0.850632
GLRLM_LongRunLowGrayLevelEmphasis	1.08056	0.656056	1.77975	0.760868
GLRLM_RunEntropy	1.50229	0.908136	2.48518	0.113022
GLRLM_HighGrayLevelRunEmphasis	0.878299	0.531791	1.45059	0.612211
GLRLM_RunLengthNonUniformityNormalized	0.940602	0.571267	1.54872	0.809803
GLSZM_GrayLevelVariance	1.03995	0.630367	1.71567	0.87811
GLSZM_ZoneVariance	1.26881	0.767302	2.09811	0.353525
GLSZM_GrayLevelNonUniformityNormalized	0.784888	0.474295	1.29887	0.345955
GLSZM_SizeZoneNonUniformityNormalized	0.884881	0.536938	1.4583	0.631352
GLSZM_SizeZoneNonUniformity	1.97785	1.15117	3.39819	0.0135201
GLSZM_GrayLevelNonUniformity	2.17307	1.25447	3.76431	0.0056276
GLSZM_LargeAreaEmphasis	1.26881	0.767302	2.09811	0.353525
GLSZM_SmallAreaHighGrayLevelEmphasis	0.843273	0.511784	1.38947	0.503479
GLSZM_ZonePercentage	1.01142	0.613902	1.66636	0.964431
GLSZM_LargeAreaLowGrayLevelEmphasis	1.59338	0.955141	2.65809	0.0743936
GLSZM_LargeAreaHighGrayLevelEmphasis	1.04146	0.632737	1.71419	0.873068
GLSZM_HighGrayLevelZoneEmphasis	0.74049	0.44767	1.22484	0.241961
GLSZM_SmallAreaEmphasis	0.884881	0.536938	1.4583	0.631352
GLSZM_LowGrayLevelZoneEmphasis	1.08177	0.656588	1.78227	0.757687
GLSZM_ZoneEntropy	1.45201	0.875286	2.40874	0.148694
GLSZM_SmallAreaLowGrayLevelEmphasis	1.10443	0.669842	1.82097	0.697036
NGTDM_Coarseness	0.475481	0.276869	0.816566	0.0070511
NGTDM_Complexity	1.09418	0.662956	1.8059	0.724779
NGTDM_Strength	0.526166	0.310535	0.891528	0.0169992
NGTDM_Contrast	1.03759	0.629733	1.70961	0.884832
NGTDM_Busyness	2.13432	1.25222	3.63781	0.00532532
