# Supplementary material for: Integrative radiogenomics analysis for predicting molecular features and survival in clear cell renal cell carcinoma
Source: Aging (Albany NY). 2021 Mar 26;13(7):9960–75. doi: 10.18632/aging.202752 (PMC8064160; doi:10.18632/aging.202752)
Supplement: Supplementary Table 3 [file aging-13-202752-s004.xlsx]

## Sheet: mut3
Supplementary Table 3. Included mutant genes.
Somatic Alterations	Frame_Shift_Deletion	Frame_Shift_Insertion	In_Frame_Deletion	In_Frame_Insertion	Missense_Mutation	Nonsense_Mutation	Nonstop_Mutation	Splice_Site	Translation_Start_Site	Total	Mutated Samples	Altered Samples
VHL	18	5	0	0	16	4	1	2	0	46	42	42
PBRM1	13	2	0	0	5	8	0	2	0	30	30	30
TTN	1	0	0	0	10	1	0	0	0	12	9	9
ATM	3	0	0	0	4	2	0	0	0	9	7	7
AHNAK2	0	0	0	0	4	1	0	0	0	5	5	5
BAP1	3	0	0	0	1	0	0	1	0	5	5	5
KDM5C	0	0	0	0	3	2	0	0	0	5	5	5
SCAF4	1	0	0	0	3	0	0	1	0	5	5	5
SETD2	2	0	0	0	1	2	0	0	0	5	5	5
MUC16	0	0	0	0	5	0	0	0	0	5	4	4
BIRC6	0	0	0	0	4	0	0	0	0	4	4	4
CACNA1S	0	0	0	0	4	0	0	0	0	4	4	4
FAT3	0	0	0	0	4	0	0	0	0	4	4	4
DST	1	0	0	0	3	0	0	0	0	4	3	3
ABCB1	0	0	0	0	3	0	0	0	0	3	3	3
ABCC6	2	0	0	0	0	1	0	0	0	3	3	3
ADGRV1	0	0	0	0	3	0	0	0	0	3	3	3
ALPK2	0	0	0	0	3	0	0	0	0	3	3	3
ANK2	1	0	0	0	1	1	0	0	0	3	3	3
ATF7IP	1	0	0	0	2	0	0	0	0	3	3	3
CENPF	0	0	0	0	3	0	0	0	0	3	3	3
CHRM3	1	0	0	0	2	0	0	0	0	3	3	3
CNOT1	2	0	0	0	1	0	0	0	0	3	3	3
COL5A3	0	0	0	0	1	1	0	1	0	3	3	3
DENND4A	0	0	0	0	2	1	0	0	0	3	3	3
DHX29	0	1	0	0	2	0	0	0	0	3	3	3
DNAH11	0	0	0	0	3	0	0	0	0	3	3	3
DNAH2	0	0	0	0	3	0	0	0	0	3	3	3
DNAH9	0	0	0	0	3	0	0	0	0	3	3	3
EMILIN1	0	0	0	0	2	0	0	1	0	3	3	3
FAM83B	0	0	0	0	3	0	0	0	0	3	3	3
HMCN1	0	0	0	0	3	0	0	0	0	3	3	3
KCNH7	0	0	0	0	3	0	0	0	0	3	3	3
KIF1B	0	0	0	0	3	0	0	0	0	3	3	3
LAMA1	0	0	0	0	3	0	0	0	0	3	3	3
LAMA4	0	0	0	0	2	0	0	1	0	3	3	3
LRP1B	1	0	0	0	2	0	0	0	0	3	3	3
LYST	1	0	0	0	1	1	0	0	0	3	3	3
MEGF10	1	0	0	0	2	0	0	0	0	3	3	3
MGA	1	0	0	0	2	0	0	0	0	3	3	3
MYCBP2	1	0	0	0	2	0	0	0	0	3	3	3
MYH4	1	0	0	0	1	0	0	1	0	3	3	3
MYO1E	0	0	0	0	3	0	0	0	0	3	3	3
NAV3	0	0	0	0	3	0	0	0	0	3	3	3
PAIP1	0	0	0	0	3	0	0	0	0	3	3	3
PCDH7	0	0	0	0	3	0	0	0	0	3	3	3
PLXNA4	0	0	0	0	3	0	0	0	0	3	3	3
PTEN	1	1	0	0	1	0	0	0	0	3	3	3
ROCK1	1	0	0	0	1	1	0	0	0	3	3	3
SACS	0	0	0	0	3	0	0	0	0	3	3	3
STAG2	0	0	0	0	3	0	0	0	0	3	3	3
SVEP1	1	0	0	0	2	0	0	0	0	3	3	3
VWA8	1	0	0	0	2	0	0	0	0	3	3	3
VWF	0	0	0	0	3	0	0	0	0	3	3	3
DHX35	0	0	0	0	3	0	0	0	0	3	2	2
IPP	0	0	0	0	3	0	0	0	0	3	2	2
IWS1	0	0	0	0	2	1	0	0	0	3	2	2
NCOA6	0	0	0	0	3	0	0	0	0	3	2	2
PDGFRA	0	0	0	0	2	1	0	0	0	3	2	2
SFMBT1	1	0	0	0	2	0	0	0	0	3	2	2
ABCA13	0	0	0	0	2	0	0	0	0	2	2	2
ABCC12	0	0	0	0	2	0	0	0	0	2	2	2
ACIN1	0	0	0	0	2	0	0	0	0	2	2	2
ACO1	0	0	0	0	2	0	0	0	0	2	2	2
ACSL6	0	0	0	0	2	0	0	0	0	2	2	2
ADAM10	0	0	0	0	2	0	0	0	0	2	2	2
ADAMTS13	0	0	0	0	2	0	0	0	0	2	2	2
ADAMTS19	0	0	0	0	1	1	0	0	0	2	2	2
ADAMTS5	1	0	0	0	1	0	0	0	0	2	2	2
ADAMTS9	0	0	0	0	2	0	0	0	0	2	2	2
ADCY8	0	0	0	0	2	0	0	0	0	2	2	2
ADGRL2	0	0	0	0	2	0	0	0	0	2	2	2
AGRN	0	0	0	0	2	0	0	0	0	2	2	2
AHNAK	0	0	0	0	2	0	0	0	0	2	2	2
AKNA	0	0	0	0	2	0	0	0	0	2	2	2
AKNAD1	0	0	0	0	2	0	0	0	0	2	2	2
AKR1B15	0	0	0	0	2	0	0	0	0	2	2	2
AMBRA1	1	0	0	0	1	0	0	0	0	2	2	2
AMPH	0	0	0	0	2	0	0	0	0	2	2	2
ANK3	0	0	0	0	2	0	0	0	0	2	2	2
ANKIB1	1	0	0	0	1	0	0	0	0	2	2	2
ANKRD11	1	0	0	0	1	0	0	0	0	2	2	2
AP2B1	0	0	0	0	2	0	0	0	0	2	2	2
AP4B1	0	1	0	0	1	0	0	0	0	2	2	2
ARID1A	1	0	0	0	1	0	0	0	0	2	2	2
ARID2	1	0	0	0	1	0	0	0	0	2	2	2
ASAP2	0	0	0	0	2	0	0	0	0	2	2	2
ASTN2	0	1	0	0	1	0	0	0	0	2	2	2
ATP1A3	0	0	0	0	1	0	0	1	0	2	2	2
ATXN7	1	0	0	0	1	0	0	0	0	2	2	2
BRCA2	0	0	0	0	2	0	0	0	0	2	2	2
BRD2	0	0	0	0	2	0	0	0	0	2	2	2
BRINP2	0	0	0	0	2	0	0	0	0	2	2	2
BRWD3	0	0	0	0	2	0	0	0	0	2	2	2
C11orf24	0	0	0	0	2	0	0	0	0	2	2	2
C2orf57	0	0	0	0	2	0	0	0	0	2	2	2
C8orf34	0	0	0	0	0	2	0	0	0	2	2	2
C9orf84	0	0	0	0	1	1	0	0	0	2	2	2
CAD	0	0	0	0	2	0	0	0	0	2	2	2
CCDC82	0	0	0	0	2	0	0	0	0	2	2	2
