# Supplementary material for: Integrative radiogenomics analysis for predicting molecular features and survival in clear cell renal cell carcinoma
Source: Aging (Albany NY). 2021 Mar 26;13(7):9960–75. doi: 10.18632/aging.202752 (PMC8064160; doi:10.18632/aging.202752)
Supplement: Supplementary Table 5 [file aging-13-202752-s006.xlsx]

## Sheet: Sheet1
Supplementary Table 5. Differently expressed genes.
mRNA	baseMean	log2FoldChange	lfcSE	stat	p value	padj
PRSS3	29.5386	2.64831	0.396446	6.68012	2.38742e-11	4.08336e-09
GABRA3	9.89924	2.98071	0.362466	8.22343	1.97761e-16	1.95825e-13
ZIC2	29.1086	2.80369	0.491933	5.69932	1.20284e-08	7.27661e-07
COL11A1	427.291	2.35319	0.358161	6.5702	5.02466e-11	7.70265e-09
DMRT3	13.4668	2.28998	0.507764	4.50992	6.48525e-06	0.000112455
SLC12A3	173.679	-2.64782	0.367665	-7.20173	5.94548e-13	1.96243e-10
PPP2R2C	240.368	2.26263	0.361958	6.25107	4.07661e-10	4.26096e-08
GCKR	27.2027	2.3066	0.385633	5.98134	2.21313e-09	1.81034e-07
AQP6	82.0775	-2.81257	0.428101	-6.56988	5.03575e-11	7.70265e-09
RGS17	131.603	2.1605	0.218986	9.86594	5.84829e-23	2.2006e-19
MAGEB2	3.64883	4.85484	0.850999	5.70487	1.1643e-08	7.15857e-07
ESRP1	170.137	-2.12745	0.421754	-5.0443	4.55186e-07	1.41318e-05
AMH	68.9056	2.22219	0.278106	7.99045	1.34447e-15	1.05395e-12
TNNT1	173.657	2.1948	0.400509	5.48003	4.2526e-08	2.05677e-06
CASP14	26.6159	-3.26396	0.755179	-4.3221	1.5455e-05	0.000221547
LHX3	0.870647	2.97825	0.569036	5.23385	1.66015e-07	6.06485e-06
CCL7	10.2357	3.12756	0.339299	9.21772	3.03487e-20	8.68846e-17
CPZ	17.2645	2.05898	0.34509	5.96649	2.42414e-09	1.93697e-07
COL7A1	648.354	3.2227	0.277275	11.6228	3.158e-31	5.94146e-27
OTX1	14.8425	2.98012	0.352825	8.44645	3.00293e-17	3.53107e-14
GJB6	11.2247	2.55661	0.405525	6.30444	2.89232e-10	3.10354e-08
PLG	911.523	-3.03571	0.468997	-6.47276	9.62275e-11	1.23158e-08
SSX1	2.98495	2.72985	0.780922	3.49568	0.000472853	0.00331208
LBP	2965.58	2.64157	0.515194	5.12733	2.93881e-07	9.89101e-06
C19orf80	254.117	3.67257	0.417252	8.80181	1.34624e-18	2.53282e-15
G6PC	409.307	-2.84079	0.357038	-7.95654	1.76917e-15	1.23279e-12
BARX1	8.61907	2.49044	0.380272	6.5491	5.78848e-11	8.50817e-09
KRT34	3.00163	3.50876	0.409098	8.57683	9.75275e-18	1.31063e-14
POPDC3	5.56635	2.25619	0.304553	7.40821	1.28014e-13	5.23576e-11
CRP	56.4532	2.16397	0.424081	5.10273	3.34787e-07	1.10117e-05
RAB25	126.005	-2.05742	0.419313	-4.90665	9.2644e-07	2.50072e-05
ANGPTL3	754.395	-2.2711	0.382394	-5.93916	2.86486e-09	2.22725e-07
MYH8	319.48	-2.39055	0.556093	-4.29883	1.71705e-05	0.000241079
LECT1	9.64659	-2.25518	0.441854	-5.10389	3.32736e-07	1.09634e-05
IL36B	1.22897	2.38429	0.532234	4.47977	7.47226e-06	0.000125409
MMP13	35.9324	3.32232	0.517208	6.42357	1.33119e-10	1.57515e-08
ZIC5	14.0154	2.76639	0.524841	5.27092	1.35744e-07	5.15939e-06
C1orf94	1.01471	2.07553	0.5305	3.9124	9.13833e-05	0.000915
S100A7	2.8433	2.58547	0.428864	6.02865	1.6533e-09	1.43342e-07
UCN2	9.22288	3.38277	0.371887	9.09623	9.35175e-20	2.1993e-16
MAGEA4	2.41526	4.30721	0.906984	4.74894	2.04485e-06	4.66324e-05
RGS20	55.0883	2.24218	0.264424	8.47948	2.26194e-17	2.83707e-14
SAA4	17.6133	2.05747	0.492908	4.17414	2.9911e-05	0.000370228
HMGA2	198.978	4.7212	0.423872	11.1383	8.1682e-29	7.68383e-25
HS3ST3A1	94.8195	3.35039	0.323962	10.3419	4.55317e-25	2.14158e-21
C10orf90	10.0997	2.81893	0.364289	7.73818	1.00853e-14	5.40647e-12
GPR78	5.5806	2.77165	0.347594	7.9738	1.53874e-15	1.11346e-12
SLAMF9	11.3054	3.23481	0.37577	8.6085	7.40215e-18	1.16053e-14
IGFN1	136.028	3.47152	0.423102	8.20493	2.30735e-16	2.17052e-13
NKX6-1	6.50955	2.89896	0.427557	6.78028	1.19947e-11	2.32648e-09
PTX3	124.723	2.13922	0.247034	8.65962	4.73355e-18	8.0961e-15
CAMKV	5.91285	2.75613	0.48599	5.67116	1.41837e-08	8.36526e-07
SLC6A18	667.992	-2.9974	0.452681	-6.62144	3.55709e-11	5.62379e-09
SLC6A5	1.21961	2.06446	0.482855	4.27553	1.90679e-05	0.000261856
CLMP	498.152	2.06166	0.353881	5.82585	5.68224e-09	3.93036e-07
AQP2	68.0008	-3.61762	0.563319	-6.42198	1.34513e-10	1.58171e-08
GGT6	108.061	-2.23299	0.386062	-5.78403	7.29339e-09	4.83162e-07
KLK1	304.093	-3.42102	0.547628	-6.24698	4.1846e-10	4.349e-08
SHOX2	53.9312	2.89452	0.274049	10.562	4.46941e-26	2.80292e-22
ACTBL2	11.2709	2.3305	0.446516	5.2193	1.79605e-07	6.46098e-06
NR0B1	10.3748	2.93451	0.813546	3.60706	0.000309688	0.00236869
UMOD	406.18	-4.53841	0.527991	-8.59561	8.28224e-18	1.19863e-14
BNC1	47.4256	2.54824	0.37554	6.78555	1.15649e-11	2.26647e-09
ZPLD1	60.6261	2.63068	0.405285	6.49093	8.53056e-11	1.13826e-08
SLN	42.4454	2.18547	0.442841	4.93512	8.01021e-07	2.24262e-05
CST2	18.2955	2.0964	0.353123	5.93676	2.90705e-09	2.25075e-07
VSTM2A	4.33408	-2.34937	0.613395	-3.83011	0.000128086	0.00119108
KRT75	2.12079	2.51697	0.636844	3.95225	7.7419e-05	0.000800748
FRMD5	39.9618	2.0919	0.350631	5.96611	2.4297e-09	1.93697e-07
NIPAL4	32.7345	2.34274	0.331982	7.05682	1.70354e-12	4.45146e-10
MS4A10	6.28744	-2.17024	0.474421	-4.57451	4.77329e-06	8.95855e-05
FAM101A	278.606	2.54435	0.333273	7.63443	2.26827e-14	1.15338e-11
FOXE1	11.3394	2.47321	0.498928	4.95706	7.15696e-07	2.04637e-05
ADIPOQ	4.33276	2.22309	0.602843	3.68768	0.000226308	0.00185604
FDCSP	44.0865	2.66268	0.620429	4.29167	1.77334e-05	0.000247138
ARSI	74.3328	2.20343	0.314257	7.01155	2.35687e-12	5.8345e-10
NUPR1L	16.6121	-2.67362	0.531935	-5.02621	5.00279e-07	1.53294e-05
KRT79	2.94967	3.15834	0.494323	6.38923	1.66724e-10	1.93626e-08
SLC18A3	90.3412	2.13464	0.65827	3.24281	0.00118358	0.006681
WNT7B	47.5846	2.64648	0.320906	8.2469	1.62555e-16	1.69907e-13
NUDT11	61.2135	2.49768	0.271164	9.21095	3.23266e-20	8.68846e-17
APCDD1L	487.592	2.50263	0.387657	6.45579	1.07656e-10	1.31615e-08
IGFL2	27.0673	2.33657	0.347189	6.72997	1.69694e-11	3.04059e-09
CTXN3	110.252	-2.70097	0.483204	-5.58972	2.27433e-08	1.24388e-06
SLCO6A1	2.59587	2.12871	0.521287	4.08356	4.435e-05	0.000508471
SERPINB4	1.43276	2.24149	0.649476	3.45123	0.000558036	0.00377115
RAD51AP2	1.00705	2.91967	0.615722	4.74186	2.11767e-06	4.78294e-05
ENSG00000214978	74.1132	-3.19102	0.564324	-5.65459	1.56218e-08	9.07125e-07
NTF4	2.8109	2.6185	0.387585	6.75595	1.41906e-11	2.63656e-09
SPANXB2	2.59276	3.03907	0.665729	4.56503	4.99418e-06	9.20248e-05
ANKRD18B	10.4768	2.73472	0.408776	6.69001	2.23157e-11	3.88748e-09
PAGE2	2.27786	3.3485	0.51869	6.45568	1.07732e-10	1.31615e-08
MCIDAS	6.86164	2.50129	0.480439	5.20626	1.92688e-07	6.86409e-06
TMEM158	160.067	2.07954	0.259648	8.00908	1.15571e-15	9.45374e-13
RTL1	5.33035	2.58954	0.591299	4.37941	1.19e-05	0.000181139
C20orf141	2.41524	2.4381	0.543905	4.4826	7.37407e-06	0.000124093
MMP12	37.1558	2.69411	0.370345	7.27459	3.47478e-13	1.2572e-10
ANXA8L1	15.5961	2.11408	0.291761	7.24592	4.29502e-13	1.49642e-10
ANXA8	17.5419	3.22862	0.486142	6.64131	3.10905e-11	5.0864e-09
ENSG00000268223	1.42982	2.63536	0.472842	5.57344	2.49758e-08	1.33493e-06
