# Supplementary material for: Integrative radiogenomics analysis for predicting molecular features and survival in clear cell renal cell carcinoma
Source: Aging (Albany NY). 2021 Mar 26;13(7):9960–75. doi: 10.18632/aging.202752 (PMC8064160; doi:10.18632/aging.202752)
Supplement: Supplementary Table 6 [file aging-13-202752-s007.xlsx]

## Sheet: Sheet1
Supplementary Table 6. Included protein profile.
Protein
1433EPSILON
4EBP1
4EBP1PS65
4EBP1PT37T46
53BP1
ACCPS79
ACC1
AKT
AKTPS473
AKTPT308
AMPKALPHA
AMPKPT172
AR
ATM
BAK
BAX
BCL2
BCLXL
BECLIN
BETACATENIN
BID
BIM
CJUNPS73
CKIT
CMETPY1235
CMYC
CRAF
CRAFPS338
CASPASE7CLEAVEDD198
CAVEOLIN1
CD31
CD49B
CDK1
CHK1
CHK1PS345
CHK2
CHK2PT68
CIAP
CLAUDIN7
COLLAGENVI
CYCLINB1
CYCLIND1
CYCLINE1
DJ1
DVL3
ECADHERIN
EEF2
EEF2K
EGFRPY1068
EGFRPY1173
EIF4E
ERALPHA
ERALPHAPS118
ERK2
FIBRONECTIN
FOXO3A
GAB2
GATA3
GSK3ALPHABETA
GSK3ALPHABETAPS21S9
HER2
HER2PY1248
HER3
HER3PY1298
HSP70
IGFBP2
INPP4B
IRS1
JNK2
KU80
LKB1
LCK
MAPKPT202Y204
MEK1
MEK1PS217S221
MIG6
MRE11
MTOR
NCADHERIN
NFKBP65PS536
NF2
NOTCH1
PCADHERIN
P27
P27PT157
P38MAPK
P38PT180Y182
P53
P70S6K
P70S6KPT389
P90RSKPT359S363
PAXILLIN
PCNA
PDK1PS241
PEA15
PI3KP110ALPHA
PKCALPHA
PKCALPHAPS657
PKCDELTAPS664
PR
PRAS40PT246
PTEN
RAD50
RAD51
RBPS807S811
S6
S6PS235S236
S6PS240S244
SHCPY317
SMAD1
SMAD3
SMAD4
SRC
SRCPY416
SRCPY527
STAT3PY705
STAT5ALPHA
STATHMIN
SYK
TUBERIN
VEGFR2
XRCC1
YAP
YAPPS127
YB1
YB1PS102
JNKPT183Y185
PAI1
MTORPS2448
ASNS
EGFR
